# Supplementary material for: Chiral and achiral phosphine derivatives of alkylidyne tricobalt carbonyl clusters as catalyst precursors for (asymmetric) inter- and intramolecular Pauson–Khand reactions
Source: Royal Society of Chemistry journal article supplement (doi:10.1039/b717698h), 2008-01-01
Supplement: b717698h.pdf [file b717698h.pdf]

**Chiral and achiral phosphine derivatives of alkylidyne tricobalt carbonyl clusters  
as catalyst precursors for (asymmetric) inter- and intramolecular Pauson-Khand  
reactions**

Viktor Moberg<sup>a</sup>, Abdul M. Mottalib<sup>a</sup>, Désirée Sauer<sup>a</sup>, Yulia Poplavskaya<sup>a</sup>, Donald C. Craig<sup>b</sup>, Stephen  
B. Colbran<sup>b</sup>, Antony J. Deeming<sup>c</sup>, Ebbe Nordlander<sup>a,\*</sup>

*<sup>a</sup>Inorganic Chemistry Research Group, Chemical Physics, Center for Chemistry and Chemical  
Engineering, Lund University, Box 124, SE-221 00 Lund, Sweden*

*<sup>b</sup>School of Chemistry, University of New South Wales, Sydney, NSW 2052, Australia*

*<sup>c</sup>Department of Chemistry, University College London, 20 Gordon Street, London WC1H 0AJ, U.K.*

**SUPPLEMENTARY MATERIAL**

---

\* Corresponding author. Fax: (+46) 46 222 44 39; E-mail: Ebbe.Nordlander@chemphys.lu.se

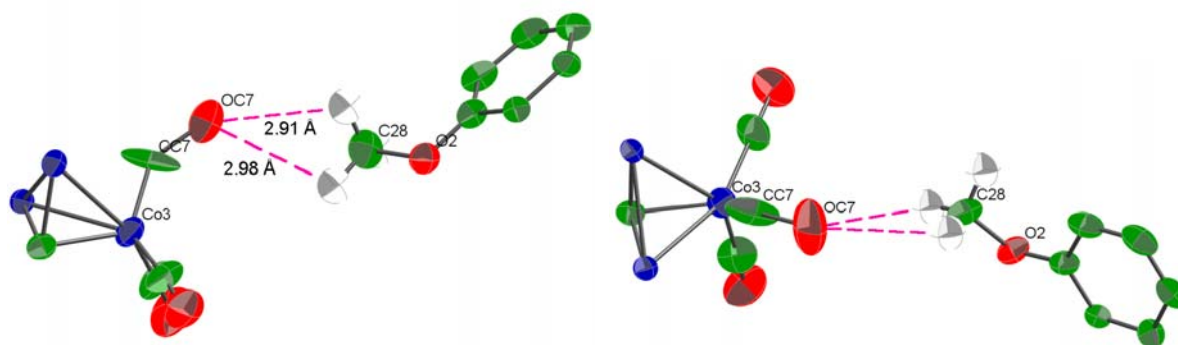

**Figure S1.** Two views (with 30% thermal ellipsoids) of the ‘bent’ carbonyl ligand in the crystal structure of  $[\text{Co}_3(\mu_3\text{-CH})(\text{CO})_7(\mu\text{-1,2-DIPAMP})]$  (**12**) highlighting: (i) the shortest intermolecular distances between the carbonyl O-atom (OC7) and the H-atoms attached to C28 of the DIAMP ligand on the neighbouring cluster; and (ii) that the larger axes of the elongated thermal ellipsoids of the carbonyl C- and O-atoms are almost orthogonally aligned (indicating disorder of the carbonyl is not responsible for the observed bending).
